# Supplementary material for: Knowledge and Perception on Animal Welfare in Chilean Undergraduate Students with Emphasis on Dairy Cattle
Source: MDPI journal article supplement (doi:10.3390/ani11071921), 2021-06-28
Supplement: s1 [file s1]

Table S1. Association between self-reported knowledge and total knowledge scores of animal welfare of students from Pontificia Universidad Católica de Chile (PUC) and Universidad de Chile (UCHile)

| Independent Variables/Covariates | Total<br>(n = 996) <sup>1</sup> |        |       |
|----------------------------------|---------------------------------|--------|-------|
|                                  | OR <sup>2</sup>                 | 95% CI |       |
|                                  |                                 | Lower  | Upper |
| Total knowledge score (0-7)      | 1.10                            | -0.01  | 0.19  |
| <i>Age</i> <sup>3</sup>          |                                 |        |       |
| 21 – 23                          | 0.73                            | -0.70  | 0.05  |
| 24 – 26                          | 1.15                            | -0.42  | 0.69  |
| 27 and older                     | 0.98                            | -0.80  | 0.74  |
| Male                             | 0.95                            | -0.23  | 0.14  |
| <i>Grade</i> <sup>4</sup>        |                                 |        |       |
| Second                           | 0.67                            | -0.81  | 0.00  |
| Third                            | 0.72                            | -0.09  | 0.76  |
| Fourth                           | 0.84                            | -0.35  | 0.70  |
| Fifth                            | 0.71                            | -0.90  | 0.22  |
| Sixth                            | 1.24                            | -0.43  | 0.88  |
| University of Chile              | 0.84                            | -0.42  | 0.07  |
| <i>Faculty</i> <sup>5</sup>      |                                 |        |       |
| Art and architecture             | 1.10                            | -0.29  | 0.49  |
| Exact and natural sciences       | 1.49                            | 0.00   | 0.80  |
| Social Sciences                  | 1.53 *                          | 0.04   | 0.81  |
| Law                              | 1.20                            | -0.22  | 0.57  |
| Humanities                       | 0.64 *                          | -0.85  | -0.05 |
| Education                        | 1.40                            | -0.05  | 0.73  |
| Technology                       | 0.62 *                          | -0.87  | -0.10 |
| Health                           | 1.66 *                          | 0.10   | 0.91  |
| Administration and commerce      | 1.45                            | -0.04  | 0.78  |

OR = odds ratios, CI = confidence interval, \* p < 0.05, \*\* < 0.01, \*\*\* p < 0.001

<sup>1</sup> Excludes participants who responded with 'not interested' to the question regarding self-reported knowledge of animal welfare

<sup>2</sup> Ordinal logistic regression

<sup>3</sup> Reference group is age group '18-20'

<sup>4</sup> Reference group is first grade

<sup>5</sup> Reference group is faculty of Agriculture

**Table S2.** Chilean university students' perceptions toward animal welfare stratified by age groups.

|                                                                                                                            | 18-20<br>(n = 428)      | 21-23<br>(n = 422)        | 24-26<br>(n = 111)       | > 26<br>(n = 39)         | P-<br>value         |
|----------------------------------------------------------------------------------------------------------------------------|-------------------------|---------------------------|--------------------------|--------------------------|---------------------|
| Importance of animal welfare in productive system, n (%)                                                                   | 417 (97.4)              | 410 (97.2)                | 109 (98.2)               | 38 (97.4)                | 0.971 <sup>1</sup>  |
| <i>Quality of life in production of:</i>                                                                                   |                         |                           |                          |                          |                     |
| Cow's milk                                                                                                                 |                         |                           |                          |                          |                     |
| Good, n (%)                                                                                                                | 99 (23.1)               | 115 (27.3)                | 28 (25.2)                | 13 (33.3)                | 0.360 <sup>2</sup>  |
| Poor, n (%)                                                                                                                | 100 (23.4)              | 89 (21.1)                 | 19 (17.1)                | 3 (7.7)                  | 0.362 <sup>1</sup>  |
| Beef                                                                                                                       |                         |                           |                          |                          |                     |
| Good, n (%)                                                                                                                | 84 (19.6) <sup>a</sup>  | 86 (20.4) <sup>a</sup>    | 41 (36.9) <sup>b</sup>   | 12 (30.8) <sup>a,b</sup> | <0.001 <sup>1</sup> |
| Poor, n (%)                                                                                                                | 95 (22.2)               | 86 (20.4)                 | 19 (17.1)                | 6 (15.4)                 | 0.364 <sup>2</sup>  |
| Salmon                                                                                                                     |                         |                           |                          |                          |                     |
| Good, n (%)                                                                                                                | 16 (3.7)                | 13 (3.1)                  | 6 (5.4)                  | 2 (5.1)                  | 0.537 <sup>1</sup>  |
| Poor, n (%)                                                                                                                | 114 (26.6)              | 105 (24.9)                | 23 (20.7)                | 12 (30.8)                | 0.363 <sup>2</sup>  |
| Pig                                                                                                                        |                         |                           |                          |                          |                     |
| Good, n (%)                                                                                                                | 132 (30.8) <sup>a</sup> | 115 (27.3) <sup>a,b</sup> | 19 (17.1) <sup>b</sup>   | 5 (12.8) <sup>a,b</sup>  | 0.004 <sup>1</sup>  |
| Poor, n (%)                                                                                                                | 29 (6.8)                | 43 (10.2)                 | 13 (11.7)                | 4 (10.3)                 | 0.373 <sup>1</sup>  |
| Laying hens                                                                                                                |                         |                           |                          |                          |                     |
| Good, n (%)                                                                                                                | 97 (22.7)               | 93 (22.0)                 | 17 (15.3)                | 7 (17.9)                 | 0.355 <sup>2</sup>  |
| Poor, n (%)                                                                                                                | 90 (21.0)               | 99 (23.5)                 | 37 (33.3)                | 14 (35.9)                | 0.358 <sup>2</sup>  |
| <i>Most important operations in animal production</i>                                                                      |                         |                           |                          |                          | 0.025 <sup>1</sup>  |
| Food, n (%)                                                                                                                | 74 (17.3) <sup>a</sup>  | 91 (21.6) <sup>a</sup>    | 30 (27.0) <sup>a</sup>   | 11 (28.2) <sup>a</sup>   |                     |
| Transportation, n (%)                                                                                                      | 13 (3.0) <sup>a</sup>   | 8 (1.9) <sup>a</sup>      | 5 (4.5) <sup>a</sup>     | 2 (5.1) <sup>a</sup>     |                     |
| Slaughter, n (%)                                                                                                           | 29 (6.8) <sup>a</sup>   | 33 (7.8) <sup>a</sup>     | 4 (3.6) <sup>a</sup>     | 3 (7.7) <sup>a</sup>     |                     |
| Rearing, n (%)                                                                                                             | 195 (45.6) <sup>a</sup> | 213 (50.5) <sup>a</sup>   | 47 (42.3) <sup>a</sup>   | 17 (43.6) <sup>a</sup>   |                     |
| Accommodation, n (%)                                                                                                       | 117 (27.3) <sup>a</sup> | 77 (18.2) <sup>b</sup>    | 25 (22.5) <sup>a,b</sup> | 6 (15.4) <sup>a,b</sup>  |                     |
| <i>Food products made while taking into account animal welfare compared to products that do not take this into account</i> |                         |                           |                          |                          | 0.022 <sup>2</sup>  |
| Better flavour, n (%)                                                                                                      | 247 (57.7) <sup>a</sup> | 222 (52.6) <sup>a</sup>   | 57 (51.4) <sup>a</sup>   | 17 (43.6) <sup>a</sup>   |                     |
| Same flavour, n (%)                                                                                                        | 69 (16.1) <sup>a</sup>  | 77 (18.2) <sup>a</sup>    | 25 (22.5) <sup>a,b</sup> | 15 (38.5) <sup>b</sup>   |                     |
| I don't know, n (%)                                                                                                        | 112 (26.2) <sup>a</sup> | 123 (29.1) <sup>a</sup>   | 29 (26.1) <sup>a</sup>   | 7 (17.9) <sup>a</sup>    |                     |
| <i>Food products made while taking into account animal welfare compared to products that do not take this into account</i> |                         |                           |                          |                          | 0.026 <sup>2</sup>  |
| Higher nutritional quality, n (%)                                                                                          | 244 (57.0) <sup>a</sup> | 269 (63.7) <sup>a</sup>   | 67 (60.4) <sup>a</sup>   | 21 (53.8) <sup>a</sup>   |                     |
| Same nutritional quality, n (%)                                                                                            | 94 (22.0) <sup>a</sup>  | 58 (13.7) <sup>b</sup>    | 23 (20.7) <sup>a,b</sup> | 12 (30.8) <sup>a</sup>   |                     |
| I don't know, n (%)                                                                                                        | 90 (21.0) <sup>a</sup>  | 95 (22.5) <sup>a</sup>    | 21 (18.9) <sup>a</sup>   | 6 (15.4) <sup>a</sup>    |                     |

<sup>1</sup>Fisher's exact test and posthoc test with Bonferroni corrections for multiple comparisons.

Different superscript letters indicate a significant difference.

<sup>2</sup>Chi-square test for independence and posthoc test with Bonferroni corrections for multiple comparisons.

Different superscript letters indicate a significant difference.

**Table S3.** Chilean university students' perceptions toward dairy cows welfare stratified by age groups.

|                                                           | 18-20<br>(n = 428)      | 21-23<br>(n = 422)      | 24-26<br>(n = 111)       | > 26<br>(n = 39)         | P-value             |
|-----------------------------------------------------------|-------------------------|-------------------------|--------------------------|--------------------------|---------------------|
| <i>Highest level of animal welfare for dairy cows in:</i> |                         |                         |                          |                          | 0.212 <sup>1</sup>  |
| In-door production, n (%)                                 | 8 (1.9)                 | 7 (1.7)                 | 2 (1.8)                  | 1 (2.6)                  |                     |
| Grazing production, n (%)                                 | 187 (43.7)              | 180 (42.7)              | 42 (37.8)                | 12 (30.8)                |                     |
| Mixture of in-door and grazing, n (%)                     | 174 (40.7)              | 182 (43.1)              | 58 (52.3)                | 24 (61.5)                |                     |
| None, animals must be free, n (%)                         | 59 (13.8)               | 53 (12.6)               | 9 (8.1)                  | 2 (5.1)                  |                     |
| <i>Most important behavior performed by dairy cows:</i>   |                         |                         |                          |                          | <0.001 <sup>1</sup> |
| Grooming, n (%)                                           | 51 (11.9) <sup>a</sup>  | 91 (21.6) <sup>b</sup>  | 23 (20.7) <sup>a,b</sup> | 11 (28.2) <sup>b</sup>   |                     |
| Maternal behavior, n (%)                                  | 298 (69.6) <sup>a</sup> | 223 (52.8) <sup>b</sup> | 57 (51.4) <sup>b</sup>   | 25 (64.1) <sup>a,b</sup> |                     |
| Reproduction, n (%)                                       | 34 (7.9) <sup>a</sup>   | 48 (11.4) <sup>a</sup>  | 13 (11.7) <sup>a</sup>   | 0 (0.0) <sup>a</sup>     |                     |
| Game behavior, n (%)                                      | 45 (10.5) <sup>a</sup>  | 60 (14.2) <sup>a</sup>  | 18 (16.2) <sup>a</sup>   | 3 (7.7) <sup>a</sup>     |                     |
| <i>When milking, a dairy cow:</i>                         |                         |                         |                          |                          | <0.001 <sup>1</sup> |
| Gets stressed, n (%)                                      | 207 (48.4) <sup>a</sup> | 237 (56.2) <sup>a</sup> | 63 (56.8) <sup>a</sup>   | 22 (56.4) <sup>a</sup>   |                     |
| Is suffering, n (%)                                       | 49 (11.4) <sup>a</sup>  | 49 (11.6) <sup>a</sup>  | 3 (2.7) <sup>b</sup>     | 1 (2.6) <sup>a,b</sup>   |                     |
| Is in pain, n (%)                                         | 75 (17.5) <sup>a</sup>  | 81 (19.2) <sup>a</sup>  | 18 (16.2) <sup>a</sup>   | 2 (5.1) <sup>a</sup>     |                     |
| Has pleasure, n (%)                                       | 97 (22.7) <sup>a</sup>  | 55 (13.0) <sup>b</sup>  | 27 (24.3) <sup>a</sup>   | 14 (35.9) <sup>a</sup>   |                     |

<sup>1</sup> Fisher's exact test and posthoc test with Bonferroni corrections for multiple comparisons. Different superscript letters indicate a significant difference.

**Table S4.** Chilean university students' perceptions toward animal welfare stratified by gender.

|                                                                                                                            | Female<br>(n = 491) | Male<br>(n = 509) | P-<br>value        |
|----------------------------------------------------------------------------------------------------------------------------|---------------------|-------------------|--------------------|
| Importance of animal welfare in productive system, n (%)                                                                   | 473 (96.3)          | 501 (98.4)        | 0.037 <sup>1</sup> |
| <i>Quality of life in production of:</i>                                                                                   |                     |                   |                    |
| Cow's milk                                                                                                                 |                     |                   |                    |
| Good, n (%)                                                                                                                | 118 (24.0)          | 137 (26.9)        | 0.331 <sup>1</sup> |
| Poor, n (%)                                                                                                                | 105 (21.4)          | 106 (20.8)        | 0.871 <sup>1</sup> |
| Beef                                                                                                                       |                     |                   |                    |
| Good, n (%)                                                                                                                | 129 (26.3)          | 94 (18.5)         | 0.004 <sup>1</sup> |
| Poor, n (%)                                                                                                                | 88 (17.9)           | 118 (23.2)        | 0.044 <sup>1</sup> |
| Salmon                                                                                                                     |                     |                   |                    |
| Good, n (%)                                                                                                                | 20 (4.1)            | 17 (3.3)          | 0.607 <sup>1</sup> |
| Poor, n (%)                                                                                                                | 115 (23.4)          | 139 (27.3)        | 0.159 <sup>1</sup> |
| Pig                                                                                                                        |                     |                   |                    |
| Good, n (%)                                                                                                                | 140 (28.5)          | 131 (25.7)        | 0.354 <sup>1</sup> |
| Poor, n (%)                                                                                                                | 56 (11.4)           | 33 (6.5)          | 0.005 <sup>1</sup> |
| Laying hens                                                                                                                |                     |                   |                    |
| Good, n (%) <sup>2</sup>                                                                                                   | 84 (17.1)           | 130 (25.5)        | 0.001 <sup>1</sup> |
| Poor, n (%)                                                                                                                | 127 (25.9)          | 113 (22.2)        | 0.194 <sup>1</sup> |
| <i>Most important operations in animal production</i>                                                                      |                     |                   | 0.083 <sup>1</sup> |
| Food, n (%)                                                                                                                | 108 (22.0)          | 98 (19.3)         |                    |
| Transportation, n (%)                                                                                                      | 13 (2.9)            | 15 (2.9)          |                    |
| Slaughter, n (%)                                                                                                           | 41 (5.5)            | 28 (5.5)          |                    |
| Rearing, n (%)                                                                                                             | 234 (46.8)          | 238 (46.8)        |                    |
| Accommodation, n (%)                                                                                                       | 95 (25.5)           | 130 (25.5)        |                    |
| <i>Food products made while taking into account animal welfare compared to products that do not take this into account</i> |                     |                   | 0.082 <sup>1</sup> |
| Better flavour, n (%)                                                                                                      | 250 (50.9)          | 293 (57.6)        |                    |
| Same flavour, n (%)                                                                                                        | 102 (20.8)          | 84 (16.5)         |                    |
| I don't know, n (%)                                                                                                        | 139 (28.3)          | 132 (25.9)        |                    |
| <i>Food products made while taking into account animal welfare compared to products that do not take this into account</i> |                     |                   | 0.003 <sup>1</sup> |
| Higher nutritional quality, n (%)                                                                                          | 276 (56.2)          | 325 (63.9)        |                    |
| Same nutritional quality, n (%)                                                                                            | 89 (18.1)           | 98 (19.3)         |                    |
| I don't know, n (%)                                                                                                        | 126 (25.7)          | 86 (16.9)         |                    |

<sup>1</sup>Chi-square test for independence

**Table S5.** Chilean university students' perceptions toward dairy cows welfare stratified by gender.

|                                                           | <b>Female</b><br>(n = 491) | <b>Male</b><br>(n = 509) | P-value             |
|-----------------------------------------------------------|----------------------------|--------------------------|---------------------|
| <i>Highest level of animal welfare for dairy cows in:</i> |                            |                          | <0.001 <sup>1</sup> |
| In-door production, n (%)                                 | 11 (2.2)                   | 7 (1.4)                  |                     |
| Grazing production, n (%)                                 | 212 (43.2)                 | 209 (41.1)               |                     |
| Mixture of in-door and grazing, n (%)                     | 230 (46.8)                 | 208 (40.9)               |                     |
| None, animals must be free, n (%)                         | 38 (7.7)                   | 85 (16.7)                |                     |
| <i>Most important behavior performed by dairy cows:</i>   |                            |                          | <0.001 <sup>1</sup> |
| Grooming, n (%)                                           | 106 (21.6)                 | 70 (13.8)                |                     |
| Maternal behavior, n (%)                                  | 263 (53.6)                 | 340 (66.8)               |                     |
| Reproduction, n (%)                                       | 62 (12.6)                  | 33 (6.5)                 |                     |
| Game behavior, n (%)                                      | 60 (12.2)                  | 66 (13.0)                |                     |
| <i>When milking, a dairy cow:</i>                         |                            |                          | 0.113 <sup>1</sup>  |
| Gets stressed, n (%)                                      | 275 (56.0)                 | 254 (49.9)               |                     |
| Is suffering, n (%)                                       | 42 (8.6)                   | 60 (11.8)                |                     |
| Is in pain, n (%)                                         | 88 (17.9)                  | 88 (17.3)                |                     |
| Has pleasure, n (%)                                       | 86 (17.5)                  | 107 (21.0)               |                     |

<sup>1</sup>Chi-square test for independence

**Table S6.** Chilean university students' perceptions toward animal welfare stratified by grade.

|                                                                                                                            | First<br>(n = 170)         | Second<br>(n = 209)      | Third<br>(n = 207)         | Fourth<br>(n = 174)      | Fifth<br>(n = 150)       | Sixth<br>(n = 90)        | P-value             |
|----------------------------------------------------------------------------------------------------------------------------|----------------------------|--------------------------|----------------------------|--------------------------|--------------------------|--------------------------|---------------------|
| Importance of animal welfare in productive system, n (%)                                                                   | 165 (97.1)                 | 203 (97.1)               | 204 (98.6)                 | 173 (99.4)               | 141 (94.0)               | 88 (97.8)                | 0.063 <sup>1</sup>  |
| <i>Quality of life in production of:</i>                                                                                   |                            |                          |                            |                          |                          |                          |                     |
| <i>Cow's milk</i>                                                                                                          |                            |                          |                            |                          |                          |                          |                     |
| Good, n (%)                                                                                                                | 41 (24.1) <sup>a</sup>     | 38 (18.2) <sup>a</sup>   | 63 (30.4) <sup>a</sup>     | 51 (29.3) <sup>a</sup>   | 35 (23.3) <sup>a</sup>   | 27 (30.0) <sup>a</sup>   | 0.040 <sup>2</sup>  |
| Poor, n (%)                                                                                                                | 29 (17.1)                  | 46 (22.0)                | 53 (25.6)                  | 31 (17.8)                | 35 (23.3)                | 17 (18.9)                | 0.293 <sup>2</sup>  |
| <i>Beef</i>                                                                                                                |                            |                          |                            |                          |                          |                          |                     |
| Good, n (%)                                                                                                                | 29 (17.1) <sup>a</sup>     | 43 (20.6) <sup>a</sup>   | 45 (21.7) <sup>a,b</sup>   | 34 (19.5) <sup>a</sup>   | 38 (25.3) <sup>a,b</sup> | 34 (37.8) <sup>b</sup>   | 0.004 <sup>2</sup>  |
| Poor, n (%)                                                                                                                | 45 (26.5) <sup>a</sup>     | 43 (20.6) <sup>a,b</sup> | 37 (17.9) <sup>a,b</sup>   | 42 (24.1) <sup>a,b</sup> | 31 (20.7) <sup>a,b</sup> | 8 (8.9) <sup>b</sup>     | 0.025 <sup>2</sup>  |
| <i>Salmon</i>                                                                                                              |                            |                          |                            |                          |                          |                          |                     |
| Good, n (%)                                                                                                                | 3 (1.8)                    | 8 (3.8)                  | 12 (5.8)                   | 5 (2.9)                  | 5 (3.3)                  | 4 (4.4)                  | 0.444 <sup>1</sup>  |
| Poor, n (%)                                                                                                                | 48 (28.2) <sup>a,b</sup>   | 65 (31.1) <sup>a</sup>   | 47 (22.7) <sup>a,b</sup>   | 28 (16.1) <sup>b</sup>   | 38 (25.3) <sup>a,b</sup> | 28 (31.1) <sup>a,b</sup> | 0.013 <sup>2</sup>  |
| <i>Pig</i>                                                                                                                 |                            |                          |                            |                          |                          |                          |                     |
| Good, n (%)                                                                                                                | 54 (31.8) <sup>a,c</sup>   | 78 (37.3) <sup>a</sup>   | 48 (23.2) <sup>c,b</sup>   | 51 (29.3) <sup>a</sup>   | 32 (21.2) <sup>a,b</sup> | 8 (8.9) <sup>b</sup>     | <0.001 <sup>2</sup> |
| Poor, n (%)                                                                                                                | 11 (6.5)                   | 10 (4.8)                 | 20 (9.7)                   | 22 (12.6)                | 15 (10.0)                | 11 (12.2)                | 0.069 <sup>2</sup>  |
| <i>Laying hens</i>                                                                                                         |                            |                          |                            |                          |                          |                          |                     |
| Good, n (%)                                                                                                                | 43 (25.3)                  | 42 (20.1)                | 39 (18.8)                  | 33 (19.0)                | 40 (26.7)                | 17 (18.9)                | 0.304 <sup>2</sup>  |
| Poor, n (%)                                                                                                                | 37 (21.8)                  | 45 (21.5)                | 50 (24.2)                  | 51 (29.3)                | 31 (20.7)                | 26 (28.9)                | 0.325 <sup>2</sup>  |
| <i>Most important operations in animal production</i>                                                                      |                            |                          |                            |                          |                          |                          | 0.082 <sup>1</sup>  |
| Food, n (%)                                                                                                                | 24 (14.1)                  | 44 (21.1)                | 36 (17.4)                  | 42 (24.1)                | 30 (20.0)                | 30 (33.3)                |                     |
| Transportation, n (%)                                                                                                      | 7 (4.1)                    | 7 (3.3)                  | 5 (2.4)                    | 5 (2.9)                  | 2 (1.3)                  | 2 (2.2)                  |                     |
| Slaughter, n (%)                                                                                                           | 11 (6.5)                   | 12 (5.7)                 | 14 (6.8)                   | 13 (7.5)                 | 11 (7.3)                 | 8 (8.9)                  |                     |
| Rearing, n (%)                                                                                                             | 81 (47.6)                  | 92 (44.0)                | 107 (51.7)                 | 74 (42.5)                | 83 (55.3)                | 35 (38.9)                |                     |
| Accommodation, n (%)                                                                                                       | 47 (27.6)                  | 54 (25.8)                | 45 (21.7)                  | 40 (23.0)                | 24 (16.0)                | 15 (16.7)                |                     |
| <i>Food products made while taking into account animal welfare compared to products that do not take this into account</i> |                            |                          |                            |                          |                          |                          | 0.159 <sup>2</sup>  |
| Better flavour, n (%)                                                                                                      | 91 (53.5)                  | 112 (53.6)               | 121 (58.5)                 | 94 (54.0)                | 83 (55.3)                | 42 (46.7)                |                     |
| Same flavour, n (%)                                                                                                        | 28 (16.5)                  | 38 (18.2)                | 35 (16.9)                  | 25 (14.4)                | 35 (23.3)                | 25 (27.8)                |                     |
| I don't know, n (%)                                                                                                        | 51 (30.0)                  | 59 (28.3)                | 51 (24.6)                  | 55 (31.6)                | 32 (21.3)                | 23 (25.6)                |                     |
| <i>Food products made while taking into account animal welfare compared to products that do not take this into account</i> |                            |                          |                            |                          |                          |                          | 0.009 <sup>2</sup>  |
| Higher nutritional quality, n (%)                                                                                          | 103 (60.6) <sup>a</sup>    | 111 (53.1) <sup>a</sup>  | 125 (60.4) <sup>a</sup>    | 115 (66.1) <sup>a</sup>  | 101 (67.3) <sup>a</sup>  | 46 (51.1) <sup>a</sup>   |                     |
| Same nutritional quality, n (%)                                                                                            | 29 (17.1) <sup>a,b,c</sup> | 56 (26.8) <sup>c</sup>   | 35 (16.9) <sup>a,b,c</sup> | 22 (12.6) <sup>b</sup>   | 20 (13.3) <sup>a,b</sup> | 25 (27.8) <sup>a,c</sup> |                     |
| I don't know, n (%)                                                                                                        | 38 (22.4) <sup>a</sup>     | 42 (20.1) <sup>a</sup>   | 47 (22.7) <sup>a</sup>     | 37 (21.3) <sup>a</sup>   | 29 (19.3) <sup>a</sup>   | 19 (21.1) <sup>a</sup>   |                     |

<sup>1</sup> Fisher's exact test and posthoc test with Bonferroni corrections for multiple comparisons.

Different superscript letters indicate a significant difference.

<sup>2</sup> Chi-square test for independence and posthoc test with Bonferroni corrections for multiple comparisons.

Different superscript letters indicate a significant difference.

**Table S7.** Chilean university students' perceptions toward dairy cows welfare stratified by grade.

|                                                           | <b>First</b><br>(n = 170)    | <b>Second</b><br>(n = 209) | <b>Third</b><br>(n = 207) | <b>Fourth</b><br>(n = 174) | <b>Fifth</b><br>(n = 150) | <b>Sixth</b><br>(n = 90) | P-value             |
|-----------------------------------------------------------|------------------------------|----------------------------|---------------------------|----------------------------|---------------------------|--------------------------|---------------------|
| <i>Highest level of animal welfare for dairy cows in:</i> |                              |                            |                           |                            |                           |                          | 0.002 <sup>1</sup>  |
| In-door production, n (%)                                 | 3 (1.8) <sup>a</sup>         | 1 (0.5) <sup>a</sup>       | 7 (3.4) <sup>a</sup>      | 1 (0.6) <sup>a</sup>       | 4 (2.7) <sup>a</sup>      | 2 (2.2) <sup>a</sup>     |                     |
| Grazing production, n (%)                                 | 78 (45.9) <sup>a</sup>       | 91 (43.5) <sup>a</sup>     | 91 (44.0) <sup>a</sup>    | 74 (42.5) <sup>a</sup>     | 62 (41.3) <sup>a</sup>    | 25 (27.8) <sup>a</sup>   |                     |
| Mixture of in-door and grazing, n (%)                     | 57 (33.5) <sup>a</sup>       | 93 (44.5) <sup>a</sup>     | 84 (40.6) <sup>a</sup>    | 84 (48.3) <sup>a,b</sup>   | 63 (42.0) <sup>a</sup>    | 57 (63.3) <sup>b</sup>   |                     |
| None, animals must be free, n (%)                         | 32 (18.8) <sup>a</sup>       | 24 (11.5) <sup>a</sup>     | 25 (12.1) <sup>a</sup>    | 15 (8.6) <sup>a</sup>      | 21 (14.0) <sup>a</sup>    | 6 (6.7) <sup>a</sup>     |                     |
| <i>Most important behavior performed by dairy cows:</i>   |                              |                            |                           |                            |                           |                          | 0.004 <sup>1</sup>  |
| Grooming, n (%)                                           | 23 (13.5) <sup>a</sup>       | 33 (15.8) <sup>a,b</sup>   | 34 (16.4) <sup>a,b</sup>  | 31 (17.8) <sup>a,b</sup>   | 29 (19.3) <sup>a,b</sup>  | 26 (28.9) <sup>b</sup>   |                     |
| Maternal behavior, n (%)                                  | 118 (69.4) <sup>a</sup>      | 141 (67.5) <sup>a</sup>    | 123 (59.4) <sup>a,b</sup> | 96 (55.2) <sup>a,b</sup>   | 77 (51.3) <sup>b</sup>    | 48 (53.3) <sup>a,b</sup> |                     |
| Reproduction, n (%)                                       | 14 (8.2) <sup>a</sup>        | 17 (8.1) <sup>a</sup>      | 16 (7.7) <sup>a</sup>     | 19 (10.9) <sup>a</sup>     | 23 (15.3) <sup>a</sup>    | 6 (6.7) <sup>a</sup>     |                     |
| Game behavior, n (%)                                      | 15 (8.8) <sup>a</sup>        | 18 (8.6) <sup>a</sup>      | 34 (16.4) <sup>a</sup>    | 28 (16.1) <sup>a</sup>     | 21 (14.0) <sup>a</sup>    | 10 (11.1) <sup>a</sup>   |                     |
| <i>When milking, a dairy cow:</i>                         |                              |                            |                           |                            |                           |                          | <0.001 <sup>1</sup> |
| Gets stressed, n (%)                                      | 81 (47.6) <sup>a,b</sup>     | 98 (46.9) <sup>b</sup>     | 119 (57.5) <sup>a,b</sup> | 95 (54.6) <sup>a,b</sup>   | 94 (62.7) <sup>a</sup>    | 42 (46.7) <sup>a,b</sup> |                     |
| Is suffering, n (%)                                       | 26 (15.3) <sup>a</sup>       | 22 (10.5) <sup>a,b</sup>   | 19 (9.2) <sup>a,b</sup>   | 19 (10.9) <sup>a,b</sup>   | 14 (9.3) <sup>a,b</sup>   | 2 (2.2) <sup>b</sup>     |                     |
| Is in pain, n (%)                                         | 26 (15.3) <sup>a</sup>       | 40 (19.1) <sup>a</sup>     | 40 (19.3) <sup>a</sup>    | 40 (23.0) <sup>a</sup>     | 16 (10.7) <sup>a</sup>    | 14 (15.6) <sup>a</sup>   |                     |
| Has pleasure, n (%)                                       | 37 (21.8) <sup>a,b,c,d</sup> | 49 (23.4) <sup>c,d</sup>   | 29 (14.0) <sup>b,d</sup>  | 20 (11.5) <sup>b</sup>     | 26 (17.3) <sup>b,d</sup>  | 32 (35.6) <sup>a,c</sup> |                     |

<sup>1</sup>Fisher's exact test and posthoc test with Bonferroni corrections for multiple comparisons. Different superscript letters indicate a significant difference.

**FULL SURVEY**  
**SECTION I : SOCIODEMOGRAPHIC CHARACTERISTICS**

**1. Gender**

- ☐ Female
- ☐ Male

**2. Age**

- ☐ 18-20
- ☐ 21-23
- ☐ 24-26
- ☐ More than 26

**3. In which university do you study?**

- ☐ Pontifical Catholic University of Chile
- ☐ University of Chile

**4. Year of career**

- ☐ First
- ☐ Second
- ☐ Third
- ☐ Room
- ☐ Fifth
- ☐ Sixth

**5 . Study area**

- ☐ Agricultural
- ☐ Art and architecture
- ☐ Exact and natural sciences
- ☐ Social Sciences
- ☐ Law
- ☐ Humanities
- ☐ Education
- ☐ Technology
- ☐ Health
- ☐ Administration and commerce



**6. Commune of residence:**

**7. It has some kind of relationship with the field**

- ☐ No
- ☐ Family members living in the countryside
- ☐ Family member working in the agricultural sector
- ☐ Residential area

## SECTION II: KNOWLEDGE

**8. Have you heard about animal welfare?**

- ☐ Yes
- ☐ No

**9. Do you consider animal welfare an important issue in productive systems?**

- ☐ Yes
- ☐ No

**10. What do you think is your level of knowledge about animal welfare?**

- ☐ High knowledge
- ☐ Medium knowledge
- ☐ Low knowledge
- ☐ NO knowledge
- ☐ I'm not interested

**11. Please select from which source did you get your knowledge on animal welfare**

- ☐ Educational institutions
- ☐ Social networks ( facebook , twitter, instagram , etc.)
- ☐ Comments from friends and siblings
- ☐ Internet ( easy to use search engines like google, wikipedia , etc. )
- ☐ Mass media (press, television, radio, cinema, etc.)

**1 2 . What do you understand by animal welfare ?**

- ☐ Adequate mental and physical state of an animal allowing the expression of their natural behaviors.
- ☐ Appropriate policies, legislation and standards developed and implemented in favor of animals.
- ☐ Avoid the use of animals to meet the needs and requirements of human beings.

**1 3 . Have you heard about the five freedoms of animal welfare?**

- ☐ Yes
- ☐ No

**1 4 . Is there a current Law on Protection Animal in Chile?**

- ☐ Yes
- ☐ No
- ☐ I do not know

**1 5 . Do you think animals have emotions?**

- ☐ Yes
- ☐ NO
- ☐ I do not know

**1 6 . Do you think animals have different personality types?**

- ☐ Yes
- ☐ NO
- ☐ I do not know

**A then a series of questions about specific dealings will be made in milk production**

**1 7 . Does a dairy cow feel more comfortable walking on a smooth concrete floor or on land?**

- ☐ Smooth cement
- ☐ Soil (in summer it is dry and in winter there is rain)
- ☐ I do not know

**1 8 . Castration (extraction of the testicle) is a common management in productive systems. Is this practice done with the use of anesthetics (chemical that causes temporary loss of sensation of a part of the body)?**

- ☐ True
- ☐ False

☐ I do not know

**19 . Is it a common practice in dairy cows in the country separating the calf from the mother after birth?**

☐ True

☐ False

☐ I do not know

**20 . The dehorning is done in bovine dairies to calves to prevent the growth of a future horn. Is or is mainly done by:**

☐ Esthetic

☐ Ease of handling

☐ I do not know

**21 . Would you like an animal welfare course available for all faculties at your university ?**

☐ Yes

☐ NO

### SECTION III PERCEPTION

**22 . In which of the following production systems do you believe that animals have a better quality of life?**

☐ Cow's milk production system

☐ Beef production system

☐ Salmon production system

☐ Pig production system

☐ Laying hens production system

**23 . In which of the following production systems do you believe that animals have a worse quality of life?**

☐ Cow's milk production system

☐ Beef production system

☐ Salmon production system

☐ Pig production system

☐ Laying hens production system

**24 . Under what conditions is the highest level of animal welfare offered for dairy cows?**

☐ In-door production system (roofed housing)

☐ Grazing production system (trees and shrubs)

☐ A mixture of both

☐ None since they must be free

**25 . Which of the following operations corresponds to the most important in an animal production system from your point of view?**

- ☐ Food
- ☐ Transportation
- ☐ Slaughter
- ☐ Rearing (man power used for rearing animals from birth to weaning)
- ☐ Accommodation

**26 . In your opinion, which is the most important behavior to be performed by dairy cows.**

- ☐ Grooming (self-care)
- ☐ Maternal behavior (mother-child interaction)
- ☐ Sexual behavior (reproduction)
- ☐ Game behavior (entertainment)

**27. From the physiological point of view, milking in a dairy cow corresponds to an event that causes:**

- ☐ Stress
- ☐ Suffering
- ☐ Pain
- ☐ Pleasure

**28. In your opinion, products made under animal welfare in terms of taste are:**

- ☐ Food with better flavor
- ☐ Food with the same flavor as products that are not under Animal welfare
- ☐ I do not know

**29 . In your opinion, products made under animal welfare in nutritional terms are:**

- ☐ Foods with higher nutritional quality
- ☐ Foods of the same nutritional quality as foods without Animal welfare
- ☐ I do not know

**Thank you for your participation!**

<https://es.surveymonkey.com/r/bienestaranimalycomunidaduniversitaria>
